## Review Article

# A mini-review on bio-inspired polymer self-assembly: single-component and interactive polymer systems

 **Xiangxi Meng**

Materials Research Laboratory, University of California Santa Barbara, Santa Barbara, CA 93106-5121, U.S.A.

**Correspondence:** Xiangxi Meng ([xiangximeng@ucsb.edu](mailto:xiangximeng@ucsb.edu))

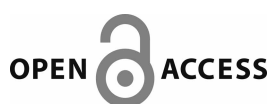

Biology demonstrates meticulous ways to control biomaterials self-assemble into ordered and disordered structures to carry out necessary bioprocesses. Empowering the synthetic polymers to self-assemble like biomaterials is a hallmark of polymer physics studies. Unlike protein engineering, polymer science demystifies self-assembly by purposely embedding particular functional groups into the backbone of the polymer while isolating others. The polymer field has now entered an era of advancing materials design by mimicking nature to a very large extent. For example, we can make sequence-specific polymers to study highly ordered mesostructures similar to studying proteins, and use charged polymers to study liquid–liquid phase separation as in membraneless organelles. This mini-review summarizes recent advances in studying self-assembly using bio-inspired strategies on single-component and multi-component systems. Sequence-defined techniques are used to make on-demand hybrid materials to isolate the effects of chirality and chemistry in synthetic block copolymer self-assembly. In the meantime, sequence patterning leads to more hierarchical assemblies comprised of only hydrophobic and hydrophilic comonomers. The second half of the review discusses complex coacervates formed as a result of the associative charge interactions of oppositely charged polyelectrolytes. The tunable phase behavior and viscoelasticity are unique in studying liquid macrophase separation because the slow polymer relaxation comes primarily from charge interactions. Studies of bio-inspired polymer self-assembly significantly impact how we optimize user-defined materials on a molecular level.

## Introduction

Biomaterials have a lot to teach us how to control polymer self-assembly. Biological macromolecules are encoded with information to form intrinsically ordered and disordered regions to carry out a plethora of functionalities necessary for bioprocesses [1,2]. Encoding synthetic materials with information opens opportunities to guide polymer self-assembly for hierarchical organization and compartmentalization that only biopolymers were capable of before [3]. Multiple intra- and inter-molecular interactions (e.g. hydrophobicity, electrostatics, sterics, and hydrogen bonding) contribute simultaneously to the ultimate shape of the polymer. Isolating these intertwined factors is meaningful but challenging for the polymer community when developing fundamental understandings of controlling polymer self-assembly. In return, wisdom gained from artificial polymer systems could potentially be applied to explain malfunctions of biomaterials due to loss of desired structures. Where biology and polymers meet inspires tremendous innovations for materials to have nature's ability to form structured complexes with advanced performance.

Seeking molecular control over bulk polymer assembly has been a longstanding quest in polymer and biology studies. How much power do we need in our synthetic polymer systems to make them work like biological macromolecules? What control handles have been given to us to tune artificial

Received: 11 August 2022  
 Revised: 17 September 2022  
 Accepted: 29 September 2022

Version of Record published:  
 18 October 2022

soft materials to make more meaningful polymers [4]? The increasing number of publications on ‘bio-inspired polymers self-assembly’ (111k as of August 2022, Web of Science!) indeed tracks the vigorous activities of embedding nature’s capability into synthetic polymers. In this mini-review article, challenges and recent advances in controlling self-assembly will be elaborated. Self-assembly will be discussed in (1) single-component systems to study the phase junction in block copolymers and to investigate hierarchical mesostructures formation [5,6], and (2) multi-component systems in the context of complex coacervation, which is a charge-driven liquid–liquid phase separation phenomenon [7] (Figure 1).

## Self-assembly in a sequence-controlled, single-component system

Self-assembly in a single-component polymer system is a common phenomenon in biological systems. Decoupling the intertwined factors contributing to the ultimate chain shape requires precise control of polymer chemical structure as subtle changes in chemistry might smear the bulk polymer properties. In contrast with traditional random copolymerization methods, sequence-defined polymer platforms provide a great handle to make on-demand polymers with precise control over chain comonomer composition, patterning, and chain length distribution [8]. There are a few well-established sequence-defined polymerizations, such as precise macromonomer approaches and interactive chain growth, and a wide variety of polymer backbones, such as the biomimetic polypeptoid/peptides, hybrid, and modified monomers, available for forming self-assemblies on a broad length scale [9–12].

Among sequence-controlled polymerization methods, polypeptoids are one of the most convenient to make with excellent yield and monodispersity [6], thus being widely used to develop fundamental understandings of polymer physics on self-assembly otherwise hard to achieve with traditional random copolymerization techniques. The fully robotic polypeptoid synthesis method grows polymer chains on a solid substrate and continues adding half-monomers cyclically with (1) an acylation step of a halogenated carboxylic acid in the presence of a coupling agent and (2) a displacement step with a primary amine. Functional monomers are directly incorporated into the polypeptoid backbones by forming an amide bond, which also avoids stereochemistry or hydrogen bonding as in other sequence-defined polymer platforms. Having tremendous flexibility in chemistry, to

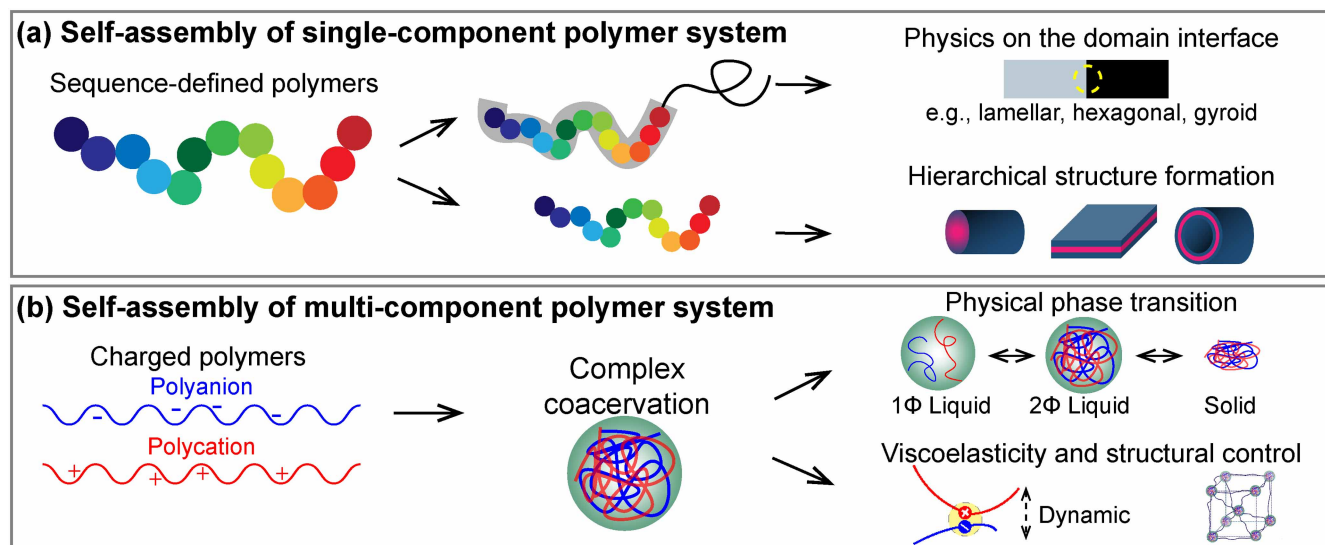

**Figure 1.** A schematic overview of the topics covered in this review, including (a) single-component and (b) the multi-component polymer systems.

In the single-component systems, hybrid polymers will be discussed to demonstrate the steric effects between domains in self-assembled block copolymers. The role of sequences will be elucidated in controlling hierarchical structures formation. In the multi-component system, complex coacervation as a classic macro-ionic phase separation phenomenon will be discussed in terms of phase behavior, viscoelasticity, and hierarchical structures formation.

date polypeptoids have been used to study the effects of local chain stiffness, hydrophobicity/hydrophilicity, patterning, chain lengths, and defects in bulk polymer properties, including self-assembly.

Polypeptoids are designed as a controllable segment to control block copolymer assembly. When chemically incompatible segments are covalently bonded together to form a block copolymer, phase separation occurs to form domains rich of either polymer as demixing minimizes entropy. Guiding polymer micro-phase separation into complex structures, such as lamellae, gyroids, and hexagonal cylinder packing was a game changer and created opportunities to extend polymer uses on much smaller scales, such as membranes for nanofiltration [13] and directed self-assembly for nanopatterning [14]. The Segalman group systematically embedded helices in hybrid diblock copolymers to learn the chain steric limitations in forming complex structures [15]. Helices are peculiar structures found in biological macromolecules to stiffen chains. Helical and stiff polypeptoid block was synthesized with chiral side groups, whereas the coiled and flexible polypeptoid block was with racemic side groups [15–18] (Figure 2a). Other than helicity, both polypeptoids were chemically identical. In dilute solutions, helical polypeptoids have smaller statistical segment lengths than flexible ones, but similar insensitivity to solvent qualities. This suggests that the polypeptoids have stronger self-steric constraints than polymer-solvent interactions in determining chain conformation [16]. To further demonstrate the effect of a stiffer block, helical polypeptoids were clicked to a poly(*n*-butyl acrylate) (PnBA, coil) to form a diblock copolymer (Figure 2b) [15]. The domain size of a hexagonal cylinder packing structure increased, and a lower order-disorder transition temperature was found, both attributing to extensive chain stretching near the block junction and negative packing interactions at the cylinder center. Similarly, an interfacial helical segment in a polystyrene (PS, coil)-polypeptoid diblock copolymer shifted the self-assembly window towards less organized conformation, showing that chain flexibility is important for more organized nanostructures (Figure 2c) [17]. Furthermore, in the lamellae phase window, helicity lowered the disorder temperature without negatively impacting the domain size (Figure 2d) [18]. A minor enthalpic penalty and a significant entropic gain were captured as a result of interfacial chain stretching. Without changing the overall polymer chemistry, polypeptoids demonstrated that a stiffened segment leads to intensified chain stretching in the block junctions that disfavors block copolymer self-assembly into more ordered nanostructures.

Monomer sequence can also tune self-assembled lamellar structures demonstrated by a hybrid diblock copolymer, PS-polypeptoid (Figure 2e) [19,20]. The polypeptoid block containing non-compatibilizing units formed lamellae with the most distinct phase boundary. The presence of compatibilizing units in the polypeptoids segment increased interfacial widths and interfacial mixing [20]. Simulation based on self-consistent field theory supported the hypothesis of chain conformational change caused by localizing compatible comonomers at the domain interface [19]. These exciting findings demonstrate fascinating fine-tuning methods to smear phase boundaries while minimizing mixing efforts to compatibilize blocks in one single polymer molecule. Moving on, reversed studies to look for minimal required chirality and compatibilizing units will be of interest to the biology and biomedicine community to design sensors that detect cellular aggregates formed as a result of protein misfolding or denaturing due to sequencing mistakes.

More hierarchical two-dimensional and three-dimensional structures can be achieved by combining hydrophobic and hydrophilic side groups in alternating or diblock sequences, such as nanofibers [21–23], nanotubes [23–25], and nanosheets [26–33] (Figure 3). Hydrophobic (e.g. aromatic, halogenated aromatic, and aliphatic) and hydrophilic (e.g. carboxylic and amine) side groups are used to tailor the amphiphilicity of the polypeptoids to form nanostructures freely in solution or assisted by a substrate [21,31,32]. The strong hydrophobic interactions ( $\pi$ - $\pi$  stacking) are a typical self-assembly driving force. To form a hydrophobic core in bilayer nanosheets, experiments and simulation showed evidence of amide bond rotation from *trans*- (coiled) to *cis*-conformation to facilitate dense polymer packing in alternating residual sequences [34,35] (Figure 3a). An interesting report showed that three units were the onset for polypeptoids to self-assemble into ordered nanosheets and nanofibers: two phenyl and one amine side groups [22]. Intriguingly, the molecular orientation in a nanosheet crystalline was visualized by a cryogenic electron microgram which provided information of precise chain stacking on an atomic level for the first time [29]! The tolerance of hydrophobic packing was investigated by chemically modifying the phenyl side groups in different positions to examine for nanosheet formation [27] and stability [26]. Aromatic side groups with two carbon spacers (phenethyl side group) appeared to favor nanosheets formation potentially due to greater rotational flexibility required for lateral and planar  $\pi$  interactions. Setting up the molecules with appropriate degrees of freedom for sufficient intra- and interpolymeric interactions hydrophobically and electrostatically is important in controlling ordered structures formation as applied materials. A study on encapsulating proteins and oxide nanoparticles into multilayered

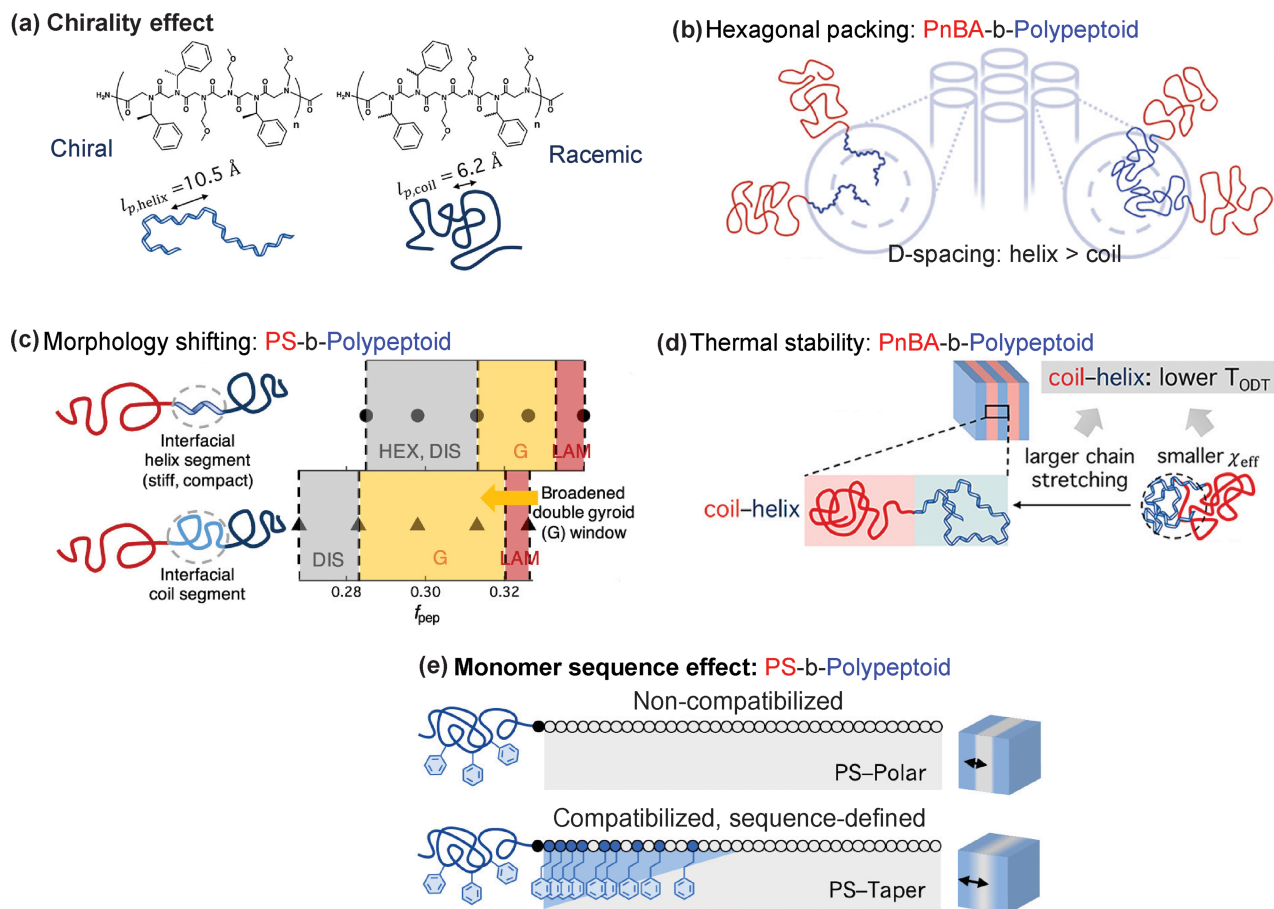

**Figure 2. Demonstration of how side group chirality and monomer sequence affect block copolymer bulk self-assembly.**

(a) Chemical structures of helical polypeptoids formed with chiral side groups and coiled polypeptoids formed with racemic side groups. The helical persistence length was a correlation distance along the helical contour, while the coiled persistence length was along the polymer chain contour, suggesting that helices made the polypeptoids segment more locally stiff in chain conformation while the chain remained overall flexible. Adapted with permission from ref. [18]; copyright © 2019 American Chemical Society. (b) Illustration of poly(*n*-butyl acrylate) (PnBA)-*b*-polypeptoids forming hexagonally packed cylinders, where helical polypeptoids block increased D-spacing due to unfavorable packing conditions due to chain stretching. Adapted with permission from ref. [15]; copyright © 2018 American Chemical Society. (c) Demonstration of polystyrene (PS)-*b*-polypeptoid self-assembled into different nanostructures and a helical interfacial segment shifted the self-assembly window towards a more significant polypeptoids volume fraction with narrower gyroids region. Adapted with permission from ref. [17]; copyright © 2021 American Chemical Society. (d) Representation of PnBA-*b*-polypeptoids self-assembled into lamellae structures with lower thermal stability against disordering, indicating unfavorable chain stretching in forming lamellae morphology. Adapted with permission from ref. [18]; copyright © 2019 American Chemical Society. (e) Schematic PS-*b*-polypeptoid diblock copolymer with non-compatible and compatible polypeptoid segments to form lamellae structures with widening intermixing regions. Adapted with permission from ref. [19]; copyright © 2020 American Chemical Society.

polypeptoid nanosheets [31] shows a promising future for using self-assembled polymers as scaffolds, functional membranes, and drug delivery vehicles.

Self-assembled nanotubes can be formed from blocky co-polypeptoid structures with one or more nonpolar segments [23–25,36,37]. The ordering of the nonpolar groups was shown to start with spheres, then a lipid-like bi-layer, followed by rolling into a single-walled tube with excellent chemical stability and mechanical strength (Figure 3b) [25]. Nonpolar block size is proportionally scaled to the tube diameter and wall thickness. A three-arm polypeptoids design demonstrated the transition from nanotubes to nanofibers by replacing the aromatic side groups with aliphatic ones and reducing the number of polar side groups [23]. Aromatic side groups with only one carbon spacer (benzyl side group) dominated reports on polypeptoid nanotubes. Surprisingly, one report showed single-wall nanotube formation from diblock copolypeptoids prepared with linear polar and



nonpolar side groups in tiles using only van der Waal interactions (Figure 3) [24]. The diameter of the nanotubes proportionally scales with the size of blocks, indicating a good control handle for tube formation. The sequence-defined platform is a great tool to advance studies of polymer self-assembly by fine-tuning specific parts of the sequence without disrupting the rest of the molecule, providing precise structure-property correlations otherwise difficult to achieve.

Polypeptoids have great potentials to embed more functionalities to target real-life problems. It will be curious to investigate the minimal changes in structures and sequence required to migrate hierarchical structures from one to another. Defect tolerance would also be an attractive direction to look into as we have a powerful tool to plant mistakes on a monomer level that could be useful in a wide range of applications. For example, we can develop diseases related models to see how discontinuous hydrophobic residuals would affect hydrophobic core formation as in biological bilayer structures. Another approach will be to explore the targeted disassembly of the sheets and tubes as protective encapsulation scaffolds to release hydrophobic drugs. All of the forementioned applications will rely on building a more fundamental understanding of structure-processing-property relations with sequence-defined polymers.

## Self-assembly induced by electrostatic in a multi-component system

A cell is a crowded place full of charged macromolecules interacting with soft frictions in water so learning to take advantage of the electrostatic interactions to drive self-assembly becomes beneficial. About 100 years ago, Oparin [38] and Haldane [39] theorized almost simultaneously that life might have started in a simple soup rich in large molecules in the primitive ocean (similar to the idea of membraneless organelles). Even though the linkage between the physical material condensation and biology remained unestablished, the idea of a stable liquid–liquid phase separation driven by supramolecular interactions attracted lots of investigations in soft materials design. Bungenberg de Jong and Kruyt used the term ‘coacervates’ for the polymer-rich phase in liquid–liquid phase separation, a colloidal assembly between oppositely charged polyelectrolytes [40,41]. Ever since the 1920s, research in coacervates and their formation mechanism has covered the span of almost all categories in charged polymer science. And coacervation also facilitated new developments in encapsulation and drug delivery methods [42,43], food and personal care products [44,45], and compartmentalization [46–48]. Understanding the unique charge-driven phase behavior has become the key to studying complex coacervates and polymer chain dynamics [49–51].

With low surface tension and abundant charge interactions [52], complex coacervates have a long history of being used to encapsulate cargos, e.g. proteins/polypeptides [53–57], DNA/RNA [58], water-soluble cargos [59–61], and biomedicine [62,63]. The non-ionic hydrophobic backbone and aromatic side groups are strong promoters for cargo loading because the polymer-cargo  $\pi$ – $\pi$  interactions resist swelling in the coacervates phase [60,61]. However, highly ionic environments can destroy the coacervation equilibrium due to having no entropic gain from crowding small molecules in a polymer-rich phase. Coacervate microencapsulation leads to developing encapsulation scaffolds for molecules of a wide variety of hydrophobicity as well as target delivery vehicles that are sensitive to environmental changes, such as salt and local pH.

The solid intractable polyelectrolyte complexes (PECs) and liquid coacervates were studied separately for a long time and the transition has only recently been discovered. Solid PECs exhibit tremendous potentials in thin film science [64–67] because of their great encapsulation and self-healing capability, as well as pH and salt sensitivity [68–71]. And PECs demonstrated unexpected moisture-dominating polymer relaxation and toughening even in the absence of salt [72–75]. Recently, the Schlenoff group showed the phase transition continuum from solid to liquid complex coacervates using a canonical pair of polyelectrolytes, poly(4-styrene sulfonate sodium salt) (PSS) and poly(diallyldimethyl ammonium chloride) (PDADMAC) in the presence of potassium bromide (KBr) [49] (Figure 4a). Neutron scattering confirmed that the chain conformation was flexible (Gaussian polymer) in coacervates, supported by the decreasing radius of gyration due to the abundance of salt and water as opposed to solids [76]. In particular, the Perry group used rheological methods to probe the polymer network change as a result of the physical transition from solid PECs to liquid coacervates [77]. A frequency-invariant crossover point in the normalized complex moduli was identified as an ‘diphasic’ salt concentration that separated a gel-like network with ionic crosslinkers and a flexible polymer network with dynamic ionic bonds (Figure 4b). This solid-to-liquid transition opens a new processing window of using complex coacervates thanks to the special salt-plasticizing nature of PECs. There are a few special features of

### (a) Polypeptoids nanosheet

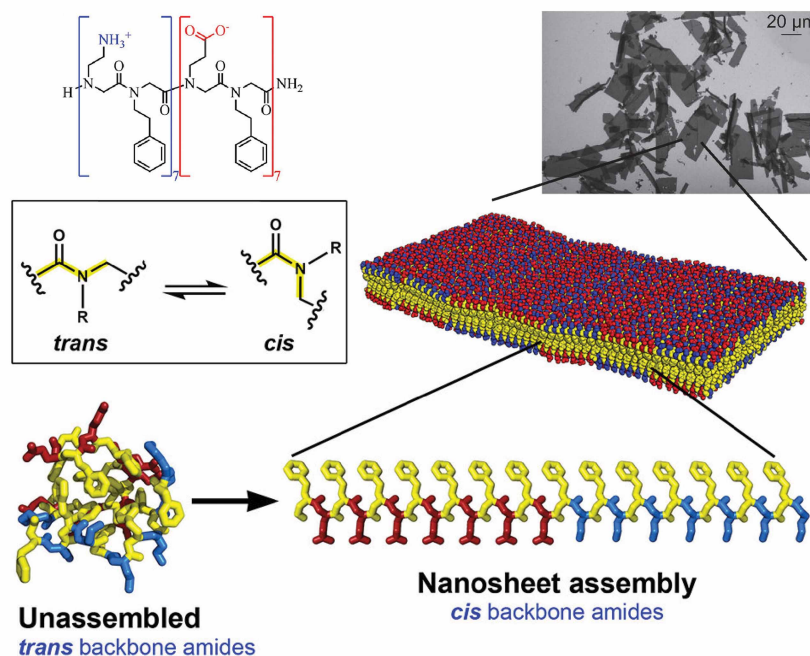

### (b) Polypeptoids nanotube

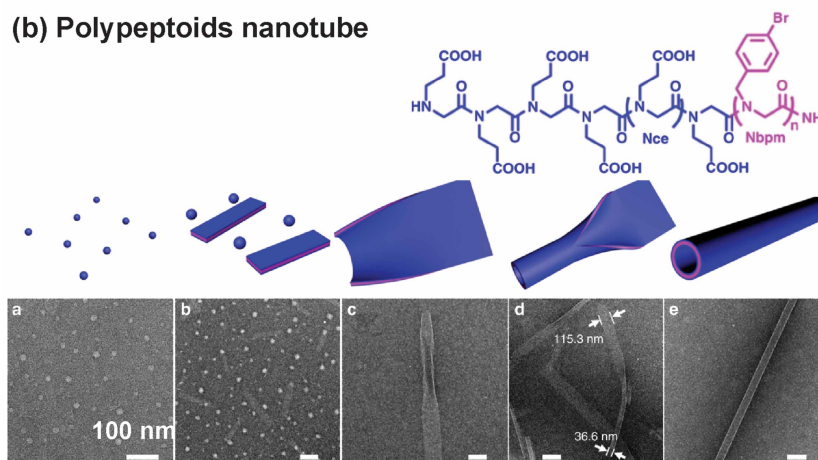

**Figure 3. Demonstration of how polypeptoids of different hydrophobic and hydrophilic monomer arrangements can lead to self-assembled into (a) nanosheet and (b) nanotubes.**

(a) Polypeptoids have a conformational change while densely packed into a lipid-like bilayer nanosheet structure. Adapted with permission from [35]; copyright © 2018 American Chemical Society. (b) The polypeptoids nanotubes formed over time and evolved from spheres with a hydrophobic core, bilayer sheet, and a tube. Adapted with permission from [25]; copyright © 2018 Springer Nature publishing group.

the thermodynamically stable, macro-ionic coacervate phase, for example, net charge neutrality [78] and time-dependent mixing kinetics to reach equilibrium [79]. Whereas PECs can have overcompensating polymer components [80,81] and kinetically trap polymers while forming a precipitate. Harnessing the liquid nature of complex coacervates, nanofabrication of films [82,83] and fibers [84–86] with a fully water-based method in one step was enabled, leading to the invention of more environmentally friendly precursor solutions.

Controlling coacervation, or the liquid–liquid phase separation behavior, is key to studying the coacervate self-assembly. Having hundreds of polyelectrolytes coacervated, the significant role of the polymer backbone chemistry is demonstrated in detail [87,88] (Figure 5a). In general, greater molecular weight [50,84,89], more

(a) PECs-coacervates phase continuum

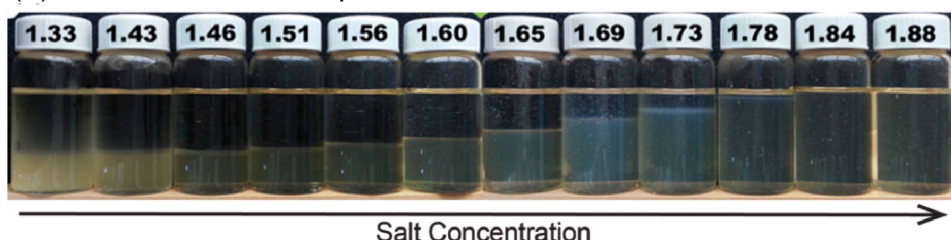

(b) solid-to-liquid transition by rheological characterization

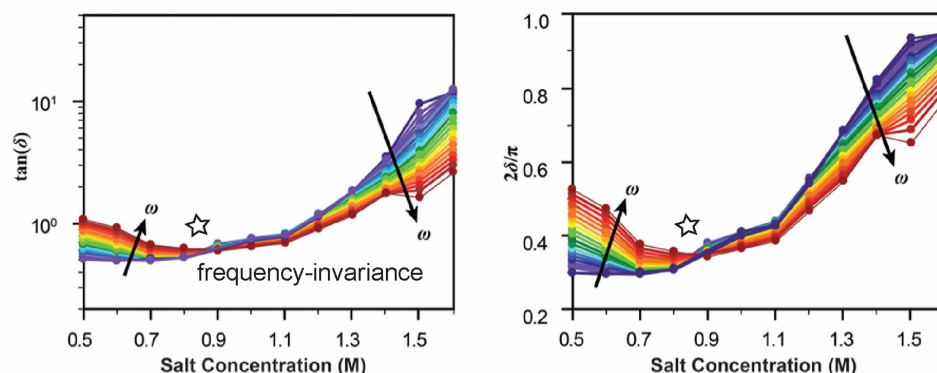

**Figure 4. The reversible phase transition continuum of polyelectrolytes complexation between liquid to solid physical states.**

(a) A digital photograph of the poly(4-styrene sulfonate sodium salt) (PSS) and poly(diallyldimethyl ammonium chloride) (PDADMAC) complex coacervates prepared in increasing salt concentrations. The numbers at the cap of each vial were the as-prepared KBr concentration. Adapted with permission from ref. [49]; copyright © 2014 American Chemical Society. Further permissions related to the material excerpted should be directed to the ACS. (b) Plots of  $\tan(\delta)$  and the normalized phase angle  $2\delta/\pi$  on the PSS/PDADMAC complexes and coacervates as a function of as-prepared salt concentration. Data were shown for oscillation frequencies from 1–100 rad/s indicated by the arrows. The star highlighted a frequency-invariant point marking the transition between solid-to-liquid in complexes. Adapted with permission from ref. [77]; copyright © 2017 Royal Society of Chemistry.

hydrophobic backbones [90–93], and charge densities [94,95] enhance coacervates/PECs salt resistance; and small protonated amines and aromatic sulfonate bind strongly [96]. In addition, sequence-defined polypeptides provided insights into weak polyelectrolytes coacervation to combat precipitation as a result of strong hydrogen-bonding. The interplay between chirality, charge density [92,93] patterning [97–101], and hydrophobicity ( $\pi$ -interactions) has been examined. In particular, having a racemic polypeptide component, a small segment of homochiral units and alternating chiral unit patterning contribute positively to liquid coacervates formation because hydrogen bonding was disrupted. Intriguingly, the different surface tensions of coacervate droplets were shown to facilitate the formation of hierarchically organized, multiphasic coacervate droplets with up to three compartments [102] (Figure 5b). This finding provides a prototypical scenario for biological condensates in primitive ocean and membraneless compartmentalization while bridging polymer chemistry and biophysics.

Modulating charge and neutral blocks (i.e. di-block, terminal, and centered) of polyelectrolyte was shown to control the formation of different hierarchical structures in the coacervate phase (Figure 5a). While bulk coacervates have been the mainstream in studies, lamellar [104], micelles [105,106], hexagonal cylinder packing [107], and crosslinked gels network (including body-centered cubic structure) [108–110] are achieved via chemically modifying the backbone chemistry of the polyelectrolytes and tuning the polymer/salt volume fraction. Among others, lamellae should be the easiest to develop as the two blocks of have extremely low compatibility (i.e. large  $\chi$ , Flory-Huggins interaction parameter) thus a phase separation is entropically favored. However, although theory and simulations provided excellent predictions of forming lamellae structure by capturing the

## (a) Coacervates self-assemblies

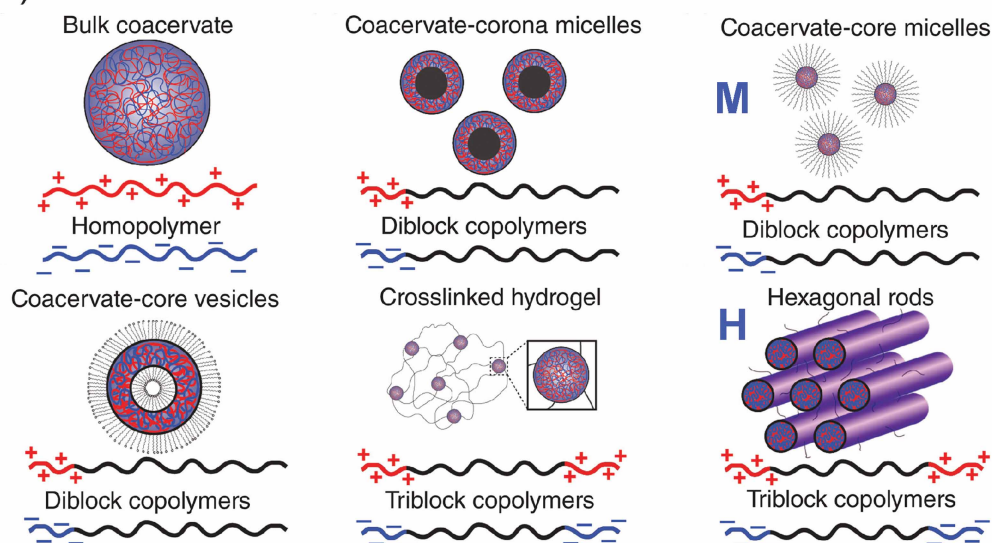

## (b) Multi-phasic coacervates (c) Provisional lamellae

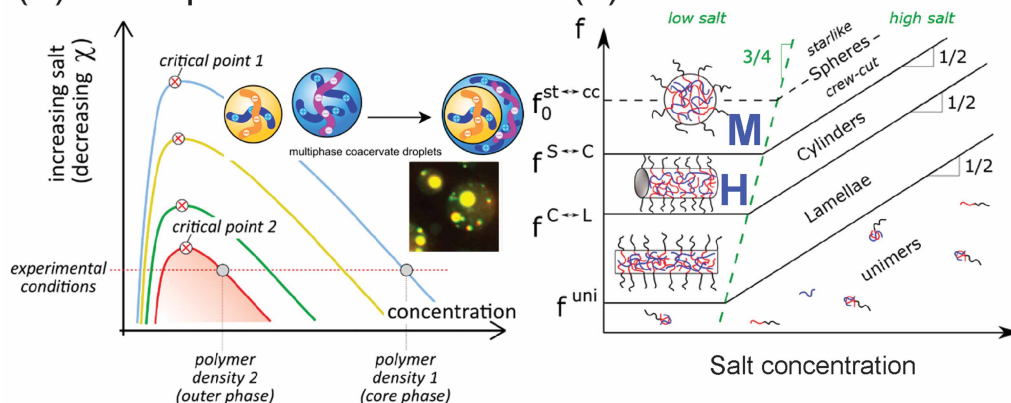

**Figure 5. Schematic of the interactive complex coacervates self-assemblies formed with various oppositely charged homo- and copolyelectrolyte structures.**

(a) Schematic presentation of the structure of complex coacervates to form bulk, micellar, gel, and hexagonally packed cylindrical morphologies in solution. Adapted with permission from ref. [62]; copyright © 2016 John Wiley and Sons publishing groups. (b) Multiphase coacervates coexist in a single droplet with different surface tensions, indicating stable liquid–liquid coacervates phase separation across other polymer systems in a single incident. Adapted with permission from ref. [102]; copyright © 2020 American Chemical Society. (c) A simulation diagram showing the combinations of polymer ionization in diblock polyelectrolytes and salt concentration for possible lamellae formation in complex coacervates. Adapted with permission from ref. [103]; copyright © 2018 American Chemical Society.

intense polymer-salt-water interplay, lamellae is experimentally the hardest to form in coacervation (Figure 5c) [103,111,112]. It is difficult to make polyelectrolytes with a perfect polarity balance between hydrophobic, hydrophilic, and ionic segments that entropically favors lamella. Moving on, I believe the electrostatic-driven self-assembly will inspire more work to leverage charges to compatibilize traditionally incompatible polymers [113], intensify chain interactions, and stabilize polymers chemically and temporarily, enabling on-demand polymer chain morphology changes in an applied materials perspective.

A more comprehensive understanding of the dynamic molecular interactions inside complex coacervates has been developed by joint efforts of experiments and simulation tools. Multiple complex parameters, such as charged site connectivity, polymer compatibility, and the water network have been taken into account for



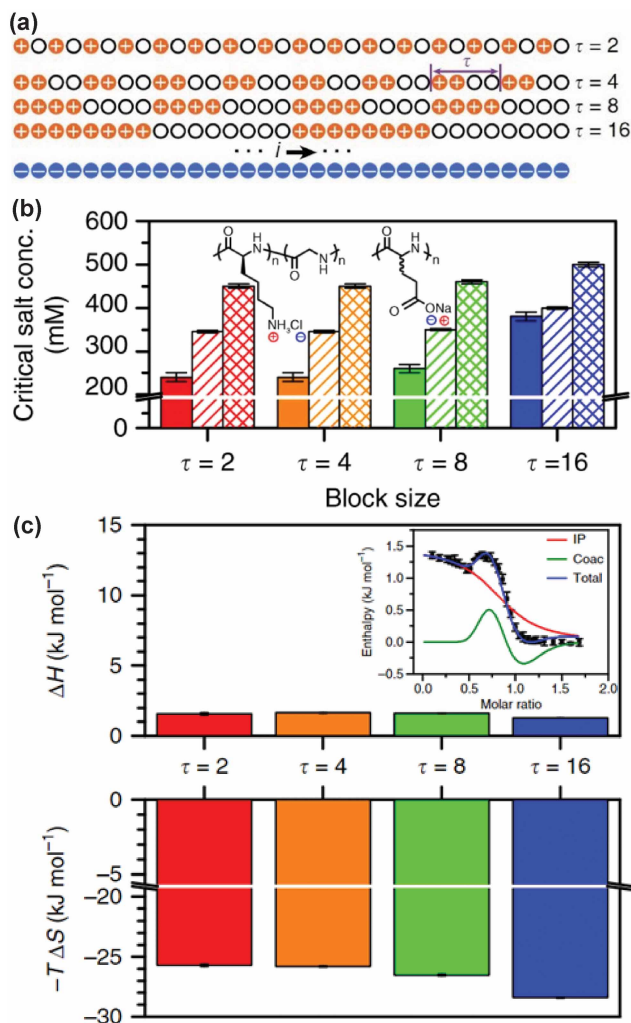

**Figure 6. Schematic demonstration of the structures of sequence-defined polycations with increasing charge and neutral block size using polypeptides to form coacervates with fully charged polyanions.**

(a) The block size  $\tau$  indicated each repeat unit in the polycation. The polyanion was fully charged and stoichiometrically mixed to form coacervates. (b) Salt resistance increased as  $\tau$  increased for each combination. (c) Different block sizes barely made a difference in enthalpy. At the same time, the entropic gain increased for larger block sizes, suggesting that coacervation was entropy-driven and larger block sizes had more significant entropic gain. Adapted from ref. [118]; copyright © 2017 Springer Nature publishing group.

physical accuracy [114,115]. Contribution to free energy upon complexation came primarily from the entropy due to the release of counter-ions and water restructuring [116–119]. Sequence-defined polypeptides showed a more significant entropic gain from coacervating the pairs with a larger block of neutral monomers and a greater salt resistance (Figure 6) [118]. The larger repeat unit size led to a more compact structures as lower probability of counterion and water aggregating near neutral segments, as well as a more significant excluded volume effect. Greater activation energy and longer time are required to shift the consecutively paired charges all at the same time [91,117–120]. It is worth mentioning that effects of charge connectivity and polymer excluded volume were neglected in traditional models but captured by the Sing group who used a polymer reference interaction site model (PRISM)-based model. Combining sequence-specific polymer materials and simulation works, a much more comprehensive description of complex coacervation will be readily developed in the foreseeable future.

Complex coacervates are viscoelastic materials because ionic pairs constantly form and break between oppositely charged polymers in water [121–123]. This unique chain interactions lead to the viscoelastic nature of complex coacervates, differentiating coacervates from traditional polymer solutions whose rheological property was predominantly determined by polymer topology, concentration, and chain length [124]. In other words, as the classic sticky Rouse Model suggests, the ionic bonds create an interactive ionic network with friction points between polymers to slow down chain relaxation. A characteristic relaxation time parameter is commonly referred to describe how liquid-like or solid-like of a coacervate [124–127]. Similar to controlling the phase behavior of coacervation, slower chain relaxation was found in systems with more hydrophobic backbones [91], decreasing dielectric constant in the solvent background [122,128], greater temperature, and less ionic environments [129,130]. Coacervates are also linear viscoelastic materials, meaning their dynamic moduli are self-similar and could be superposed to reveal a governing behavior by shift factors, such as temperature, pH, solution dielectric constant, salt/polymer concentration [121–123,127,129]. The capability to manipulate the interactions in complex coacervates significantly impacts how coacervates can be designed as interactive material platform for uses in a wide range of applications. With the versatile handles given to tune the charge interactions in water, future work to embed functionalities to complex coacervate materials will benefit a lot from the fundamental theories developed so far, for example, making a semiconductive film via coacervation [131].

One last topic that fascinated me was the studies on water dynamics in the complex coacervates network. Water molecules, taking over 80 wt% of coacervates, are a critical but often times overlooked factor in coacervation studies because capturing water dynamics is difficult. A lot of the studies indicate how water restructures by simply stating swelling or anti-swelling the coacervates phase. Work by the Han group fascinated me by showing the dynamic hydrophobicity-induced dehydration process in coacervation using a custom-made instrument [132,133]. They also showed that water diffusivity was high near the polymer network probed by spin labels, indicative of a highly interactive polymer-water network [134–136]! Work to investigate the role of water and its interactions with polymer, salt, and counterions will be interesting and enriching our knowledge of a much more dynamic network that surrounds and reshapes the polymer network.

## Conclusion

Nature demonstrated excellent skillsets in making spontaneous self-assembly happen in water. This review paper discusses how sequence and charge, two of the most impactful drivers in biomaterial self-assembly can be used to build fundamental understandings of synthetic polymer self-assembly. In particular, bio-inspired sequence-specific polymers provide an extremely well-controlled method to make user-defined molecules, offering a handle to directly and precisely correlate polymer chemistry and performance on a molecular level. Charge-driven self-assembly in multi-polymer network opens opportunities to modulate polymer interactions in water, allowing for a fully water-based material platform in applied sciences. Building on the well-established science of bio-inspired polymers, engineering applied materials will be enlightened in fields, such as energy conversion, nanolithography, and biomedicine.

## Summary

- Bio-inspired strategies pave the paths toward designing functional polymer materials with bio-material's strengths of self-directed assembly, bringing tremendous impacts in fundamental biophysics and smart materials design.
- The power of controlling polymer sequence drives rapid development of understanding sequence patterning and chain steric effects in copolymer self-assembly.
- The viscoelastic and dynamic chain interactions in forming liquid complex coacervates provide new insights into charge-driven self-assemblies related to membraneless organelles/ or biological condensates.

## Competing Interests

The author declares that there are no competing interests associated with this manuscript.

## Acknowledgements

The author X.M. thank Intel Corporation for financial support of the CINEMA project. The author would also like to thank Dr. Shuyi Xie, Audra DeStefano, and Jerrick Edmund for helpful discussions.

## Abbreviations

PDADMAC, poly(diallyldimethyl ammonium chloride); PECs, polyelectrolyte complexes; PSS, poly(4-styrene sulfonate sodium salt); PnBA, poly(n-butyl acrylate).

## References

- Zhou, H.-X., Nguemaha, V., Mazararakos, K. and Qin, S. (2018) Why do disordered and structured proteins behave differently in phase separation? *Trends Biochem. Sci.* **43**, 499–516 <https://doi.org/10.1016/j.tibs.2018.03.007>
- Uversky, V.N. (2019) Intrinsically disordered proteins and their "mysterious" (meta)physics. *Front. Phys.* **7**, 10 <https://doi.org/10.3389/fphys.2019.00010>
- Rowan, S.J. (2009) Polymers with bio-inspired strength. *Nat. Chem.* **1**, 347–348 <https://doi.org/10.1038/nchem.312>
- Bates, F.S., Brant, P., Coates, G.W., Lipson, J., Osuji, C., Pablo, J.D. et al. (2016) Frontiers in Polymer Science and Engineering, Report of a 2016 NSF Workshop
- Simon, R.J., Kania, R.S., Zuckermann, R.N., Huebner, V.D., Jewell, D.A., Banville, S. et al. (1992) Peptoids: a modular approach to drug discovery. *Proc. Natl Acad. Sci. U.S.A.* **89**, 9367–9371 <https://doi.org/10.1073/pnas.89.20.9367>
- Zuckermann, R.N., Kerr, J.M., Kent, S.B.H. and Moos, W.H. (1992) Efficient method for the preparation of peptoids [oligo(N-substituted glycines)] by submonomer solid-phase synthesis. *J. Am. Chem. Soc.* **114**, 10646–10647 <https://doi.org/10.1021/ja00052a076>
- Bayley, H., Cazimoglu, I. and Hoskin, C.E.G. (2019) Synthetic tissues. *Emerg. Top. Life Sci.* **3**, 615–622 <https://doi.org/10.1042/etls20190120>
- Perry, S.L. and Sing, C.E. (2020) 100th anniversary of macromolecular science viewpoint: opportunities in the physics of sequence-Defined polymers. *ACS Macro Lett.* **9**, 216–225 <https://doi.org/10.1021/acsmacrolett.0c00002>
- DeStefano, A.J., Segalman, R.A. and Davidson, E.C. (2021) Where biology and traditional polymers meet: the potential of associating sequence-Defined polymers for materials science. *Jacs Au.* **1**, 1556–1571 <https://doi.org/10.1021/jacsau.1c00297>
- Yang, C.J., Wu, K.B., Deng, Y., Yuan, J.S. and Niu, J. (2021) Geared toward applications: a perspective on functional sequence-Controlled polymers. *ACS Macro Lett.* **10**, 243–257 <https://doi.org/10.1021/acsmacrolett.0c00855>
- Nanjan, P. and Porel, M. (2019) Sequence-defined non-natural polymers: synthesis and applications. *Polym. Chem.* **10**, 5406–5424 <https://doi.org/10.1039/c9py00886a>
- Clapperton, A.M., Babi, J. and Tran, H. (2022) A field guide to optimizing peptoid synthesis. *ACS Polymers Au.* in press <https://doi.org/10.1021/acspolymersau.2c00036>
- Hampu, N., Werber, J.R., Chan, W.Y., Feinberg, E.C. and Hillmyer, M.A. (2020) Next-Generation ultrafiltration membranes enabled by block polymers. *Acs Nano* **14**, 16446–16471 <https://doi.org/10.1021/acsnano.0c07883>
- Jeong, S.-J., Kim, J.Y., Kim, B.H., Moon, H.-S. and Kim, S.O. (2013) Directed self-assembly of block copolymers for next generation nanolithography. *Mater. Tod.* **16**, 468–476 <https://doi.org/10.1016/j.matmod.2013.11.002>
- Davidson, E.C., Rosales, A.M., Patterson, A.L., Russ, B., Yu, B., Zuckermann, R.N. et al. (2018) Impact of helical chain shape in sequence-Defined polymers on polypeptoid block copolymer self-Assembly. *Macromolecules* **51**, 2089–2098 <https://doi.org/10.1021/acs.macromol.8b00055>
- Yu, B., Danielsen, S.P.O., Yang, K.-C., Ho, R.-M., Walker, L.M. and Segalman, R.A. (2020) Insensitivity of sterically defined helical chain conformations to solvent quality in dilute solution. *ACS Macro Lett.* **9**, 849–854 <https://doi.org/10.1021/acsmacrolett.0c00293>
- Yu, B., Li, R. and Segalman, R.A. (2021) Tuning the double gyroid phase window in block copolymers via polymer chain conformation near the interface. *Macromolecules* **54**, 5388–5396 <https://doi.org/10.1021/acs.macromol.1c00048>
- Yu, B., Danielsen, S.P.O., Patterson, A.L., Davidson, E.C. and Segalman, R.A. (2019) Effects of helical chain shape on lamellae-Forming block copolymer self-Assembly. *Macromolecules* **52**, 2560–2568 <https://doi.org/10.1021/acs.macromol.9b00211>
- Patterson, A.L., Yu, B.H., Danielsen, S.P.O., Davidson, E.C., Fredrickson, G.H. and Segalman, R.A. (2020) Monomer sequence effects on interfacial width and mixing in self-Assembled diblock copolymers. *Macromolecules* **53**, 3262–3272 <https://doi.org/10.1021/acs.macromol.9b02426>
- Patterson, A.L., Danielsen, S.P.O., Yu, B.H., Davidson, E.C., Fredrickson, G.H. and Segalman, R.A. (2019) Sequence effects on block copolymer self-assembly through tuning chain conformation and segregation strength utilizing sequence-defined polypeptoids. *Macromolecules* **52**, 1277–1286 <https://doi.org/10.1021/acs.macromol.8b02298>
- Chen, C.L., Zuckermann, R.N. and DeYoreo, J.J. (2016) Surface-Directed assembly of sequence defined synthetic polymers into networks of hexagonally patterned nanoribbons with controlled functionalities. *Acs Nano* **10**, 5314–5320 <https://doi.org/10.1021/acsnano.6b01333>
- Castelletto, V., Seitsonen, J., Tewari, K.M., Hasan, A., Edkins, R.M., Ruokolainen, J. et al. (2020) Self-Assembly of minimal peptoid sequences. *ACS Macro Lett.* **9**, 494–499 <https://doi.org/10.1021/acsmacrolett.9b01010>
- Jin, H.B., Jian, T.Y., Ding, Y.H., Chen, Y.L., Mu, P., Wang, L. et al. (2019) Solid-phase synthesis of three-armed star-shaped peptoids and their hierarchical self-assembly. *Biopolymers* **110**. <https://doi.org/10.1002/bip.23258>
- Sun, J., Jiang, X., Lund, R., Downing, K.H., Balsara, N.P. and Zuckermann, R.N. (2016) Self-assembly of crystalline nanotubes from monodisperse amphiphilic diblock copolypeptoid tiles. *Proc. Natl Acad. Sci. U.S.A.* **113**, 3954–3959 <https://doi.org/10.1073/pnas.1517169113>
- Jin, H.B., Ding, Y.H., Wang, M.M., Song, Y., Liao, Z.H., Newcomb, C.J. et al. (2018) Designable and dynamic single-walled stiff nanotubes assembled from sequence-defined peptoids. *Nat. Commun.* **9**, 270 <https://doi.org/10.1038/s41467-017-02059-1>
- Robertson, E.J., Nehls, E.M. and Zuckermann, R.N. (2016) Structure-Rheology relationship in nanosheet-Forming peptoid monolayers. *Langmuir* **32**, 12146–12158 <https://doi.org/10.1021/acs.langmuir.6b02736>

- 27 Robertson, E.J., Proulx, C., Su, J.K., Garcia, R.L., Yoo, S., Nehls, E.M. et al. (2016) Molecular engineering of the peptoid nanosheet hydrophobic core. *Langmuir* **32**, 11946–11957 <https://doi.org/10.1021/acs.langmuir.6b02735>
- 28 Flood, D., Proulx, C., Robertson, E.J., Battigelli, A., Wang, S., Schwartzberg, A.M. et al. (2016) Improved chemical and mechanical stability of peptoid nanosheets by photo-crosslinking the hydrophobic core. *Chem. Commun.* **52**, 4753–4756 <https://doi.org/10.1039/c6cc00588h>
- 29 Jiang, X., Greer, D.R., Kundu, J., Ophus, C., Minor, A.M., Prendergast, D. et al. (2018) Imaging unstained synthetic polymer crystals and defects on atomic length scales using cryogenic electron microscopy. *Macromolecules* **51**, 7794–7799 <https://doi.org/10.1021/acs.macromol.8b01508>
- 30 Cai, B., Li, Z. and Chen, C.L. (2021) Programming amphiphilic peptoid oligomers for hierarchical assembly and inorganic crystallization. *Acc. Chem. Res.* **54**, 81 <https://doi.org/10.1021/acs.accounts.0c00533>
- 31 Ma, J., Cai, B., Zhang, S., Jian, T., De Yoreo, J.J., Chen, C.-L. et al. (2021) Nanoparticle-Mediated assembly of peptoid nanosheets functionalized with solid-binding proteins: designing heterostructures for hierarchy. *Nano Lett.* **21**, 1636–1642 <https://doi.org/10.1021/acs.nanolett.0c04285>
- 32 Jin, H., Jiao, F., Daily, M.D., Chen, Y., Yan, F., Ding, Y.H. et al. (2016) Highly stable and self-repairing membrane-mimetic 2D nanomaterials assembled from lipid-like peptoids. *Nat. Commun.* **7**, 12252 <https://doi.org/10.1038/ncomms12252>
- 33 Robertson, E.J., Battigelli, A., Proulx, C., Mannige, R.V., Haxton, T.K., Yun, L. et al. (2016) Design, synthesis, assembly, and engineering of peptoid nanosheets. *Acc. Chem. Res.* **49**, 379 <https://doi.org/10.1021/acs.accounts.5b00439>
- 34 Edison, J.R., Spencer, R.K., Butterfoss, G.L., Hudson, B.C., Hochbaum, A.I., Paravastu, A.K. et al. (2018) Conformations of peptoids in nanosheets result from the interplay of backbone energetics and intermolecular interactions. *Proc. Natl Acad. Sci. U.S.A.* **115**, 5647–5651 <https://doi.org/10.1073/pnas.1800397115>
- 35 Hudson, B.C., Battigelli, A., Connolly, M.D., Edison, J., Spencer, R.K., Whitelam, S. et al. (2018) Evidence for cis amide bonds in peptoid nanosheets. *J. Phys. Chem. Lett.* **9**, 2574–2578 <https://doi.org/10.1021/acs.jpclett.8b01040>
- 36 de Espinosa, L.M., Meesorn, W., Moatsou, D. and Weder, C. (2017) Bioinspired polymer systems with stimuli-responsive mechanical properties. *Chem. Rev.* **117**, 12851–12892 <https://doi.org/10.1021/acs.chemrev.7b00168>
- 37 Li, Z.L., Tran, D.K., Nguyen, M., Jian, T.Y., Yan, F., Jenekhe, S.A. et al. (2022) Amphiphilic peptoid-directed assembly of oligoanilines into highly crystalline conducting nanotubes. *Macromol. Rapid. Comm.* **43**, e2100639 <https://doi.org/10.1002/marc.202100639>
- 38 Oparin, A.I. (1924) The origin of life: the origin of life. By A. I. oparin. translated by sergius morgulis. macmillan, 1938. *Science* **88**, 58 <https://doi.org/10.1126/science.88.2272.58.a>
- 39 Haldane, J.B.S. (1929) Origin of life. *Ration. Annu.* **148**, 3–10
- 40 Bungenberg de Jong, H.G. and Kruyt, H.R. (1929) Year coacervation (partial miscibility in colloid systems). *Proc. Sect. Sci. K. Ned. Akad. Wetenschappen* **32**, 849–856
- 41 Bungenberg de Jong, H.G. and Kruyt, H.R. (1930) Koazervation. *Kolloid-Zeitschrift.* **50**, 39–48 <https://doi.org/10.1007/BF01422833>
- 42 Devi, N., Sarmah, M., Khatun, B. and Maji, T.K. (2017) Encapsulation of active ingredients in polysaccharide-protein complex coacervates. *Adv. Colloid Interface Sci.* **239**, 136–145 <https://doi.org/10.1016/j.cis.2016.05.009>
- 43 Johnson, N.R. and Wang, Y.D. (2014) Coacervate delivery systems for proteins and small molecule drugs. *Expert Opin. Drug Deliv.* **11**, 1829–1832 <https://doi.org/10.1517/17425247.2014.941355>
- 44 Eghbal, N. and Choudhary, R. (2018) Complex coacervation: coacervation: encapsulation and controlled release of active agents in food systems. *Lwt-Food Sci. Technol.* **90**, 254–264 <https://doi.org/10.1016/j.lwt.2017.12.036>
- 45 Moschakis, T. and Biliaderis, C.G. (2017) Biopolymer-based coacervates: structures, functionality and applications in food products. *Curr. Opin. Colloid Interface Sci.* **28**, 96–109 <https://doi.org/10.1016/j.cocis.2017.03.006>
- 46 Frankel, E.A., Bevilacqua, P.C. and Keating, C.D. (2016) Polyamine/nucleotide coacervates provide strong compartmentalization of Mg<sup>2+</sup>, nucleotides, and RNA. *Langmuir* **32**, 2041–2049 <https://doi.org/10.1021/acs.langmuir.5b04462>
- 47 Drobot, B., Iglesias-Artola, J.M., Le Vay, K., Mayr, V., Kar, M., Kreysing, M. et al. (2018) Compartmentalised RNA catalysis in membrane-free coacervate protocells. *Nat. Commun.* **9**, 3643 <https://doi.org/10.1038/s41467-018-06072-w>
- 48 Aumiller, W.M. and Keating, C.D. (2016) Phosphorylation-mediated RNA/peptide complex coacervation as a model for intracellular liquid organelles. *Nat. Chem.* **8**, 129–137 <https://doi.org/10.1038/Nchem.2414>
- 49 Wang, Q.F. and Schlenoff, J.B. (2014) The polyelectrolyte complex/coacervate continuum. *Macromolecules* **47**, 3108–3116 <https://doi.org/10.1021/ma500500q>
- 50 Chollakup, R., Beck, J.B., Dirnberger, K., Tirrell, M. and Eisenbach, C.D. (2013) Polyelectrolyte molecular weight and salt effects on the phase behavior and coacervation of aqueous solutions of poly(acrylic acid) sodium salt and poly(allylamine) hydrochloride. *Macromolecules* **46**, 2376–2390 <https://doi.org/10.1021/ma202172q>
- 51 Perry, S.L., Li, Y., Priftis, D., Leon, L. and Tirrell, M. (2014) The effect of salt on the complex coacervation of vinyl polyelectrolytes. *Polymers* **6**, 1756–1772 <https://doi.org/10.3390/polym6061756>
- 52 Jho, Y., Yoo, H.Y., Lin, Y.X., Han, S. and Hwang, D.S. (2017) Molecular and structural basis of low interfacial energy of complex coacervates in water. *Adv. Colloid Interface Sci.* **239**, 61–73 <https://doi.org/10.1016/j.cis.2016.07.003>
- 53 McTigue, W.C.B. and Perry, S.L. (2021) Chapter ten: incorporation of proteins into complex coacervates. *Methods Enzymol.* **646**, 277–306 <https://doi.org/10.1016/bs.mie.2020.06.006>
- 54 McTigue, W.C.B. and Perry, S.L. (2020) Protein encapsulation using complex coacervates: what nature Has to teach Us. *Small* **16**, e1907671 <https://doi.org/10.1002/smll.201907671>
- 55 McTigue, W.C.B. and Perry, S.L. (2019) Design rules for encapsulating proteins into complex coacervates. *Soft Matter* **15**, 3089–3103 <https://doi.org/10.1039/c9sm00372j>
- 56 Zhao, M.M. and Zacharia, N.S. (2018) Protein encapsulation via polyelectrolyte complex coacervation: protection against protein denaturation. *J. Chem. Phys.* **149**, 163326 <https://doi.org/10.1063/1.5040346>
- 57 Nolles, A., van Dongen, N.J.E., Westphal, A.H., Visser, A.J.W.G., Kleijn, J.M., van Berkel, W.J.H. et al. (2017) Encapsulation into complex coacervate core micelles promotes EGFP dimerization. *Phys. Chem. Chem. Phys.* **19**, 11380–11389 <https://doi.org/10.1039/c7cp00755h>
- 58 Black, K.A., Priftis, D., Perry, S.L., Yip, J., Byun, W.Y. and Tirrell, M. (2014) Protein encapsulation via polypeptide complex coacervation. *ACS Macro Lett.* **3**, 1088–1091 <https://doi.org/10.1021/mz500529v>



- 59 Zhao, M.M., Eghtesadi, S.A., Dawadi, M.B., Wang, C., Huang, S.Y., Seymore, A.E. et al. (2017) Partitioning of small molecules in hydrogen-Bonding complex coacervates of poly(acrylic acid) and poly(ethylene glycol) or pluronic block copolymer. *Macromolecules* **50**, 3819–3831 <https://doi.org/10.1021/acs.macromol.6b02815>
- 60 Zhao, M.M. and Zacharia, N.S. (2016) Sequestration of methylene blue into polyelectrolyte complex coacervates. *Macromol. Rapid Commun.* **37**, 1249–1255 <https://doi.org/10.1002/marc.201600244>
- 61 Huang, S.Y., Zhao, M.M., Dawadi, M.B., Cai, Y.H., Lapitsky, Y., Modarelli, D.A. et al. (2018) Effect of small molecules on the phase behavior and coacervation of aqueous solutions of poly(diallyldimethylammonium chloride) and poly (sodium 4-styrene sulfonate). *J. Colloid Interface Sci.* **518**, 216–224 <https://doi.org/10.1016/j.jcis.2018.02.029>
- 62 Blocher, W.C. and Perry, S.L. (2017) Complex coacervate-based materials for biomedicine. *Wiley Interdiscip. Rev. Nanomed. Nanobiotechnol.* **9**. <https://doi.org/10.1002/wnan.1442>
- 63 Vehlou, D., Schmidt, R., Gebert, A., Siebert, M., Lips, K.S. and Muller, M. (2016) Polyelectrolyte complex based interfacial drug delivery system with controlled loading and improved release performance for bone therapeutics. *Nanomaterials* **6**, 53 <https://doi.org/10.3390/nano6030053>
- 64 Lengert, E.V., Koltsov, S.I., Li, J., Ermakov, A.V., Parakhonskiy, B.V., Skorb, E.V. et al. (2020) Nanoparticles in polyelectrolyte multilayer layer-by-layer (LbL) films and capsules-key enabling components of hybrid coatings. *Coatings* **10**, 1131 <https://doi.org/10.3390/coatings10111131>
- 65 Shu, M.M., Long, S.J., Huang, Y.W., Li, D.P., Li, H. and Li, X.F. (2019) High strength and antibacterial polyelectrolyte complex CS/HS hydrogel films for wound healing. *Soft Matter* **15**, 7686–7694 <https://doi.org/10.1039/c9sm01380f>
- 66 Sadman, K., Wang, Q.F., Chen, S.H., Delgado, D.E. and Shull, K.R. (2017)pH-controlled electrochemical deposition of polyelectrolyte complex films. *Langmuir* **33**, 1834–1844 <https://doi.org/10.1021/acs.langmuir.6b04491>
- 67 Hu, X.R., McIntosh, E., Simon, M.G., Stail, C. and Thomas, S.W. (2016) Stimuli-Responsive free-Standing layer-By-Layer films. *Adv. Mater.* **28**, 715–721 <https://doi.org/10.1002/adma.201504219>
- 68 Fu, J.C., Wang, Q.F. and Schlenoff, J.B. (2015) Extruded superparamagnetic saloplastic polyelectrolyte nanocomposites. *ACS Appl. Mater. Interfaces* **7**, 895–901 <https://doi.org/10.1021/am5074694>
- 69 Schaaf, P. and Schlenoff, J.B. (2015) Saloplastics: processing compact polyelectrolyte complexes. *Adv. Mater.* **27**, 2420–2432 <https://doi.org/10.1002/adma.201500176>
- 70 Zhang, Y.P., Yildirim, E., Antila, H.S., Valenzuela, L.D., Sammalkorpi, M. and Lutkenhaus, J.L. (2015) The influence of ionic strength and mixing ratio on the colloidal stability of PDAC/PSS polyelectrolyte complexes. *Soft Matter* **11**, 7392–7401 <https://doi.org/10.1039/c5sm01184a>
- 71 Lalwani, S.M., Eneh, C.I. and Lutkenhaus, J.L. (2020) Emerging trends in the dynamics of polyelectrolyte complexes. *Phys. Chem. Chem. Phys.* **22**, 24157–24177 <https://doi.org/10.1039/d0cp03696j>
- 72 Lalwani, S.M., Batys, P., Sammalkorpi, M. and Lutkenhaus, J.L. (2021) Relaxation times of solid-like polyelectrolyte complexes of varying pH and water content. *Macromolecules* **54**, 7765–7776 <https://doi.org/10.1021/acs.macromol.1c00940>
- 73 Suarez-Martinez, P.C., Batys, P., Sammalkorpi, M. and Lutkenhaus, J.L. (2019) Time–temperature and time–water superposition principles applied to poly(allylamine)/poly(acrylic acid) complexes. *Macromolecules* **52**, 3066–3074 <https://doi.org/10.1021/acs.macromol.8b02512>
- 74 Zhang, Y., Li, F., Valenzuela, L.D., Sammalkorpi, M. and Lutkenhaus, J.L. (2016) Effect of water on the thermal transition observed in poly(allylamine hydrochloride)–Poly(acrylic acid) complexes. *Macromolecules* **49**, 7563–7570 <https://doi.org/10.1021/acs.macromol.6b00742>
- 75 Zhang, Y.P., Batys, P., O’Neal, J.T., Li, F., Sammalkorpi, M. and Lutkenhaus, J.L. (2018) Molecular origin of the glass transition in polyelectrolyte assemblies. *ACS Cent. Sci.* **4**, 638–644 <https://doi.org/10.1021/acscentsci.8b00137>
- 76 Fares, H.M., Ghoussoub, Y.E., Delgado, J.D., Fu, J.C., Urban, V.S. and Schlenoff, J.B. (2018) Scattering neutrons along the polyelectrolyte complex/Coacervate continuum. *Macromolecules* **51**, 4945–4955 <https://doi.org/10.1021/acs.macromol.8b00699>
- 77 Liu, Y., Momani, B., Winter, H.H. and Perry, S.L. (2017) Rheological characterization of liquid-to-solid transitions in bulk polyelectrolyte complexes. *Soft Matter* **13**, 7332–7340 <https://doi.org/10.1039/c7sm01285c>
- 78 Schlenoff, J.B., Yang, M., Digby, Z.A. and Wang, Q. (2019) Ion content of polyelectrolyte complex coacervates and the donnan equilibrium. *Macromolecules* **52**, 9149–9159 <https://doi.org/10.1021/acs.macromol.9b01755>
- 79 McTigue, W.C.B., Voke, E., Chang, L.W. and Perry, S.L. (2020) The benefit of poor mixing: kinetics of coacervation. *Phys. Chem. Chem. Phys.* **22**, 20643–20657 <https://doi.org/10.1039/d0cp03224g>
- 80 Fares, H.M. and Schlenoff, J.B. (2017) Equilibrium overcompensation in polyelectrolyte complexes. *Macromolecules* **50**, 3968–3978 <https://doi.org/10.1021/acs.macromol.7b00665>
- 81 Ghostine, R.A., Markarian, M.Z. and Schlenoff, J.B. (2013) Asymmetric growth in polyelectrolyte multilayers. *J. Am. Chem. Soc.* **135**, 7636–7646 <https://doi.org/10.1021/ja401318m>
- 82 Kurtz, I.S., Sui, S., Hao, X., Huang, M.F., Perry, S.L. and Schiffman, J.D. (2019) Bacteria-resistant, transparent, free-standing films prepared from complex coacervates. *ACS Appl. Bio Mater.* **2**, 3926–3933 <https://doi.org/10.1021/acsabm.9b00502>
- 83 Kelly, K.D. and Schlenoff, J.B. (2015) Spin-coated polyelectrolyte coacervate films. *ACS Appl. Mater. Interfaces* **7**, 13980–13986 <https://doi.org/10.1021/acsami.5b02988>
- 84 Meng, X.X., Du, Y.F., Liu, Y.L., Coughlin, E.B., Perry, S.L. and Schiffman, J.D. (2021) Electrospinning fibers from oligomeric complex coacervates: no chain entanglements needed. *Macromolecules* **54**, 5033–5042 <https://doi.org/10.1021/acs.macromol.1c00397>
- 85 Meng, X.X., Schiffman, J.D. and Perry, S.L. (2018) Electrospinning cargo-containing polyelectrolyte complex fibers: correlating molecular interactions to complex coacervate phase behavior and fiber formation. *Macromolecules* **51**, 8821–8832 <https://doi.org/10.1021/acs.macromol.8b01709>
- 86 Meng, X.X., Perry, S.L. and Schiffman, J.D. (2017) Complex coacervation: chemically stable fibers electrospun from aqueous polyelectrolyte solutions. *ACS Macro Lett.* **6**, 505–511 <https://doi.org/10.1021/acsmacrolett.7b00173>
- 87 Romyantsev, A.M., Jackson, N.E. and de Pablo, J.J. (2021) Polyelectrolyte complex coacervates: recent developments and new frontiers. *Annu. Rev. Condensed Matter Phys.* **12**, 155–176 <https://doi.org/10.1146/annurev-conmatphys-042020-113457>
- 88 Sing, C.E. and Perry, S.L. (2020) Recent progress in the science of complex coacervation. *Soft Matter* **16**, 2885–2914 <https://doi.org/10.1039/d0sm00001a>
- 89 Li, L., Srivastava, S., Andreev, M., Marciel, A.B., de Pablo, J.J. and Tirrell, M.V. (2018) Phase behavior and salt partitioning in polyelectrolyte complex coacervates. *Macromolecules* **51**, 2988–2995 <https://doi.org/10.1021/acs.macromol.8b00238>

- 90 Sadman, K., Wang, Q.F., Chen, Y.Y., Keshavarz, B., Jiang, Z. and Shull, K.R. (2017) Influence of hydrophobicity on polyelectrolyte complexation. *Macromolecules* **50**, 9417–9426 <https://doi.org/10.1021/acs.macromol.7b02031>
- 91 Liu, Y., Santa Chalarca, C.F., Carmean, R.N., Olson, R.A., Madinya, J., Sumerlin, B.S. et al. (2020) Effect of polymer chemistry on the linear viscoelasticity of complex coacervates. *Macromolecules* **53**, 7851–7864 <https://doi.org/10.1021/acs.macromol.0c00758>
- 92 Tabandeh, S. and Leon, L. (2019) Engineering peptide-based polyelectrolyte complexes with increased hydrophobicity. *Molecules* **24**, 868 <https://doi.org/10.3390/molecules24050868>
- 93 Tabandeh, S., Lemus, C.E. and Leon, L. (2021) Deciphering the role of  $\pi$ -interactions in polyelectrolyte complexes using rationally designed peptides. *Polymers* **13**, 2074 <https://doi.org/10.3390/polym13132074>
- 94 Huang, J. and Laaser, J.E. (2021) Charge density and hydrophobicity-Dominated regimes in the phase behavior of complex coacervates. *ACS Macro Lett.* **10**, 1029–1034 <https://doi.org/10.1021/acsmacrolett.1c00382>
- 95 Kayitmazer, A.B., Koksai, A.F. and Iyilik, E.K. (2015) Complex coacervation of hyaluronic acid and chitosan: effects of pH, ionic strength, charge density, chain length and the charge ratio. *Soft Matter*. **11**, 8605–8612 <https://doi.org/10.1039/c5sm01829c>
- 96 Fu, J.C., Fares, H.M. and Schlenoff, J.B. (2017) Ion-Pairing strength in polyelectrolyte complexes. *Macromolecules* **50**, 1066–1074 <https://doi.org/10.1021/acs.macromol.6b02445>
- 97 Pacalin, N.M., Leon, L. and Tirrell, M. (2016) Directing the phase behavior of polyelectrolyte complexes using chiral patterned peptides. *Eur. Phys. J. Spec. Top.* **225**, 1805–1815 <https://doi.org/10.1140/epjst/e2016-60149-6>
- 98 Perry, S.L., Leon, L., Hoffmann, K.Q., Kade, M.J., Priftis, D., Black, K.A. et al. (2015) Chirality-selected phase behaviour in ionic polypeptide complexes. *Nat. Commun.* **6**, 6052 <https://doi.org/10.1038/ncomms7052>
- 99 Johnston, B.M., Johnston, C.W., Letteri, R.A., Lytle, T.K., Sing, C.E., Emrick, T. et al. (2017) The effect of comb architecture on complex coacervation. *Org. Biomol. Chem.* **15**, 7630–7642 <https://doi.org/10.1039/c7ob01314k>
- 100 Priftis, D., Leon, L., Song, Z.Y., Perry, S.L., Margossian, K.O., Tropnikova, A. et al. (2015) Self-Assembly of alpha-Helical polypeptides driven by complex coacervation. *Angew. Chem. Int. Ed. Engl.* **54**, 11128–11132 <https://doi.org/10.1002/anie.201504861>
- 101 Hoffmann, K.Q., Perry, S.L., Leon, L., Priftis, D., Tirrell, M. and de Pablo, J.J. (2015) A molecular view of the role of chirality in charge-driven polypeptide complexation. *Soft Matter*. **11**, 1525–1538 <https://doi.org/10.1039/c4sm02336f>
- 102 Lu, T.M. and Spruijt, E. (2020) Multiphase complex coacervate droplets. *J. Am. Chem. Soc.* **142**, 2905–2914 <https://doi.org/10.1021/jacs.9b11468>
- 103 Romyantsev, A.M., Zhulina, E.B. and Borisov, O.V. (2018) Scaling theory of complex coacervate core micelles. *ACS Macro Lett.* **7**, 811–816 <https://doi.org/10.1021/acsmacrolett.8b00316>
- 104 Romyantsev, A.M., Kramarenko, E.Y. and Borisov, O.V. (2018) Microphase separation in complex coacervate Due to incompatibility between polyanion and polycation. *Macromolecules* **51**, 6587–6601 <https://doi.org/10.1021/acs.macromol.8b00721>
- 105 Amann, M., Diget, J.S., Lyngso, J., Pedersen, J.S., Narayanan, T. and Lund, R. (2019) Kinetic pathways for polyelectrolyte coacervate micelle formation revealed by time-Resolved synchrotron SAXS. *Macromolecules* **52**, 8227–8237 <https://doi.org/10.1021/acs.macromol.9b01072>
- 106 Zhao, M.M., Wang, C., Jiang, H.W., Dawadi, M.B., Vogt, B.D., Modarelli, D.A. et al. (2019) Polyelectrolyte-micelle coacervates: intrapolymer-dominant vs. interpolymer-dominant association, solute uptake and rheological properties. *Soft Matter*. **15**, 3043–3054 <https://doi.org/10.1039/c8sm02229a>
- 107 Srivastava, S., Levi, A.E., Goldfeld, D.J. and Tirrell, M.V. (2020) Structure, morphology, and rheology of polyelectrolyte complex hydrogels formed by self-assembly of oppositely charged triblock polyelectrolytes. *Macromolecules* **53**, 5763–5774 <https://doi.org/10.1021/acs.macromol.0c00847>
- 108 Srivastava, S., Andreev, M., Levi, A.E., Goldfeld, D.J., Mao, J., Heller, W.T. et al. (2017) Gel phase formation in dilute triblock copolyelectrolyte complexes. *Nat. Commun.* **8**, 14131 <https://doi.org/10.1038/ncomms14131>
- 109 Hunt, J.N., Feldman, K.E., Lynd, N.A., Deek, J., Campos, L.M., Spruell, J.M. et al. (2011) Tunable, high modulus hydrogels driven by ionic coacervation. *Adv. Mater.* **23**, 2327–2331 <https://doi.org/10.1002/adma.201004230>
- 110 Marciel, A.B., Srivastava, S., Ting, J.M. and Tirrell, M.V. (2021) SAXS methods for investigating macromolecular and self-assembled polyelectrolyte complexes. In *Methods in Enzymology* (Christine D. Keating ed.), Vol. 646, pp. 223–259, Academic Press
- 111 Subbotin, A.V. and Semenov, A.N. (2021) The structure of polyelectrolyte complex coacervates and multilayers. *Macromolecules* **54**, 1314–1328 <https://doi.org/10.1021/acs.macromol.0c02470>
- 112 Ong, G.M.C. and Sing, C.E. (2019) Mapping the phase behavior of coacervate-driven self-assembly in diblock copolyelectrolytes. *Soft Matter*. **15**, 5116–5127 <https://doi.org/10.1039/c9sm00741e>
- 113 Fredrickson, G.H., Xie, S., Edmund, J., Le, M.L., Sun, D., Grzetic, D.J. et al. (2022) Ionic compatibilization of polymers. *ACS Polym. Au.* <https://doi.org/10.1021/acspolymersau.2c00026>
- 114 Perry, S.L. and Sing, C.E. (2015) PRISM-based theory of complex coacervation: excluded volume versus chain correlation. *Macromolecules* **48**, 5040–5053 <https://doi.org/10.1021/acs.macromol.5b01027>
- 115 Sing, C.E. (2017) Development of the modern theory of polymeric complex coacervation. *Adv. Colloid Interface Sci.* **239**, 2–16 <https://doi.org/10.1016/j.cis.2016.04.004>
- 116 Fu, J. and Schlenoff, J.B. (2016) Driving forces for oppositely charged polyion association in aqueous solutions: enthalpic, entropic, but not electrostatic. *J. Am. Chem. Soc.* **138**, 980–990 <https://doi.org/10.1021/jacs.5b11878>
- 117 Lytle, T.K. and Sing, C.E. (2018) Tuning chain interaction entropy in complex coacervation using polymer stiffness, architecture, and salt valency. *Mol. Syst. Des. Eng.* **3**, 183–196 <https://doi.org/10.1039/c7me00108h>
- 118 Chang, L.W., Lytle, T.K., Radhakrishna, M., Madinya, J.J., Velez, J., Sing, C.E. et al. (2017) Sequence and entropy-based control of complex coacervates. *Nat. Commun.* **8**, 1273 <https://doi.org/10.1038/s41467-017-01249-1>
- 119 Madinya, J.J., Chang, L.W., Perry, S.L. and Sing, C.E. (2020) Sequence-dependent self-coacervation in high charge-density polyampholytes. *Mol. Syst. Des. Eng.* **5**, 632–644 <https://doi.org/10.1039/c9me00074g>
- 120 Radhakrishna, M., Basu, K., Liu, Y.L., Shamsi, R., Perry, S.L. and Sing, C.E. (2017) Molecular connectivity and correlation effects on polymer coacervation. *Macromolecules* **50**, 3030–3037 <https://doi.org/10.1021/acs.macromol.6b02582>
- 121 Hamad, F.G., Chen, Q. and Colby, R.H. (2018) Linear viscoelasticity and swelling of polyelectrolyte complex coacervates. *Macromolecules* **51**, 5547–5555 <https://doi.org/10.1021/acs.macromol.8b00401>

- 122 Sun, J., Schiffman, J.D. and Perry, S.L. (2022) Linear viscoelasticity and time–alcohol superposition of chitosan/hyaluronic acid complex coacervates. *ACS Appl. Polym. Mater.* **4**, 1617–1625 <https://doi.org/10.1021/acsapm.1c01411>
- 123 Liu, Y.L., Winter, H.H. and Perry, S.L. (2017) Linear viscoelasticity of complex coacervates. *Adv. Colloid Interface Sci.* **239**, 46–60 <https://doi.org/10.1016/j.cis.2016.08.010>
- 124 Akkaoui, K., Yang, M., Digby, Z.A. and Schlenoff, J.B. (2020) Ultraviscosity in entangled polyelectrolyte complexes and coacervates. *Macromolecules* **53**, 4234–4246 <https://doi.org/10.1021/acs.macromol.0c00133>
- 125 Chen, Q., Tudyry, G.J. and Colby, R.H. (2013) Ionomer dynamics and the sticky rouse model. *J. Rheol.* **57**, 1441–1462 <https://doi.org/10.1122/1.4818868>
- 126 Yang, M., Digby, Z.A., Chen, Y. and Schlenoff, J.B.) Valence-induced jumps in coacervate properties. *Sci. Adv.* **8**, eabm4783 <https://doi.org/10.1126/sciadv.abm4783>
- 127 Larson, R.G., Liu, Y. and Li, H.L. (2021) Linear viscoelasticity and time-temperature-salt and other superpositions in polyelectrolyte coacervates. *J. Rheol.* **65**, 77–102 <https://doi.org/10.1122/8.0000156>
- 128 Sun, J.F., Perry, S.L. and Schiffman, J.D. (2019) Electrospinning nanofibers from chitosan/hyaluronic acid complex coacervates. *Biomacromolecules* **20**, 4191–4198 <https://doi.org/10.1021/acs.biomac.9b01072>
- 129 Ali, S. and Prabhu, V.M. (2018) Relaxation behavior by time-salt and time-temperature superpositions of polyelectrolyte complexes from coacervate to precipitate. *Gels* **4**, 11 <https://doi.org/10.3390/gels4010011>
- 130 Yang, M., Shi, J. and Schlenoff, J.B. (2019) Control of dynamics in polyelectrolyte complexes by temperature and salt. *Macromolecules* **52**, 1930–1941 <https://doi.org/10.1021/acs.macromol.8b02577>
- 131 Le, M.L., Rawlings, D., Danielsen, S.P.O., Kennard, R.M., Chabinyc, M.L. and Segalman, R.A. (2021) Aqueous formulation of concentrated semiconductive fluid using polyelectrolyte coacervation. *ACS Macro Lett.* **10**, 1008–1014 <https://doi.org/10.1021/acsmacrolett.1c00354>
- 132 Jing, B., Ferreira, M., Gao, Y., Wood, C., Li, R., Fukuto, M. et al. (2019) Unconventional complex coacervation between neutral polymer and inorganic polyoxometalate in aqueous solution via direct water mediation. *Macromolecules* **52**, 8275–8284 <https://doi.org/10.1021/acs.macromol.9b01091>
- 133 Prather, L.J., Weerasekare, G.M., Sima, M., Quinn, C. and Stewart, R.J. (2019) Aqueous liquid-liquid phase separation of natural and synthetic polyguanidiniums. *Polymers* **11**, 649 <https://doi.org/10.3390/polym11040649>
- 134 Kausik, R., Srivastava, A., Korevaar, P.A., Stucky, G., Waite, J.H. and Han, S. (2009) Local water dynamics in coacervated polyelectrolytes monitored through dynamic nuclear polarization-enhanced <sup>1</sup>H NMR. *Macromolecules* **42**, 7404–7412 <https://doi.org/10.1021/ma901137g>
- 135 Huang, K.Y., Yoo, H.Y., Jho, Y., Han, S. and Hwang, D.S. (2016) Bicontinuous fluid structure with low cohesive energy: molecular basis for exceptionally low interfacial tension of complex coacervate fluids. *Acs Nano* **10**, 5051–5062 <https://doi.org/10.1021/acs.nano.5b07787>
- 136 Ortony, J.H., Hwang, D.S., Franck, J.M., Waite, J.H. and Han, S. (2013) Asymmetric collapse in biomimetic complex coacervates revealed by local polymer and water dynamics. *Biomacromolecules* **14**, 1395–1402 <https://doi.org/10.1021/bm4000579>
